# Supplementary material
Source: PubMed Central journal article supplement (PMC3243785)
Supplement: NIHMS335914-supplement-1_si_001.pdf [file NIHMS335914-supplement-1_si_001.pdf]

# 2,2',3,3',6,6'-Hexachlorobiphenyl (PCB 136) is Enantioselectively Oxidized to Hydroxylated Metabolites by Rat Liver Microsomes

## SUPPORTING INFORMATION

Xianai Wu,<sup>a</sup> Ananya Pramanik,<sup>a</sup> Michael W. Duffel,<sup>b</sup> Eugene G. Hrycay,<sup>c</sup>  
Stelvio M. Bandiera,<sup>c</sup> Hans-Joachim Lehmler,<sup>a\*</sup> Izabela Kania-Korwel<sup>a</sup>

<sup>a</sup> *Department of Occupational and Environmental Health, College of Public Health, University of Iowa, Iowa City, Iowa 52242;* <sup>b</sup> *Department of Pharmaceutical Sciences and Experimental Therapeutics, College of Pharmacy, University of Iowa, Iowa City, Iowa 52317;* <sup>c</sup> *Faculty of Pharmaceutical Sciences, University of British Columbia, 2146 East Mall, Vancouver BC, Canada V6T1Z3*

### RECEIVED DATE

Corresponding Author: Dr. Hans-Joachim Lehmler, The University of Iowa,

Department of Occupational and Environmental Health,

University of Iowa Research Park, #221 IREH, Iowa City, IA 52242-5000

Phone: (319) 335-4211, Fax: (319) 335-4290, e-mail: hans-joachim-lehmler@uiowa.edu

## Table of Contents

|                                                                                                                                                                                  |    |
|----------------------------------------------------------------------------------------------------------------------------------------------------------------------------------|----|
| <b>TABLE S1.</b> Effect of treatment on body and liver weights of the male rats used for the preparation of liver microsomes.                                                    | 3  |
| <b>TABLE S2.</b> Activities of P450 enzymes in male rat liver microsomes.                                                                                                        | 3  |
| <b>TABLE S3:</b> Limits of detection, resolution and background levels of PCB 136 and its hydroxylated metabolites in control samples in the microsomal incubations.             | 4  |
| <b>TABLE S4:</b> Ratios of 5-OH-PCB 136 and 4-OH-PCB 136 formed in different microsomal incubations over time (50 $\mu$ M PCB 136).                                              | 5  |
| <b>TABLE S5:</b> Ratios of 5-OH-PCB 136 and 4-OH-PCB 136 formed in different microsomal incubations over time (5 $\mu$ M PCB 136).                                               | 5  |
| <b>FIGURE S1:</b> PCB 136 is metabolized to three hydroxylated metabolites by liver microsomes prepared from PB-treated rat.                                                     | 6  |
| <b>FIGURE S2:</b> Mass spectra of the methylated derivatives of 5-OH-PCB 136, 4-OH-PCB 136 and 4,5-diOH-PCB 136.                                                                 | 7  |
| <b>FIGURE S3:</b> Carbon monoxide (CO) inhibited the metabolism of PCB 136 (5 $\mu$ M and 50 $\mu$ M) and reduced the formation of 5-OH and 4-OH PCB 136.                        | 8  |
| <b>FIGURE S4:</b> Time-dependent formation of hydroxylated PCB 136 metabolites by liver microsomes from PB-, DEX- and VEH-treated rats at a PCB 136 concentration of 50 $\mu$ M. | 9  |
| <b>FIGURE S5:</b> Time-dependent formation of hydroxylated PCB 136 metabolites by liver microsomes from PB-, DEX- and VEH-treated rats at a PCB 136 concentration of 5 $\mu$ M.  | 10 |
| <b>FIGURE S6:</b> Time-dependent metabolism of PCB 136 atropisomers by liver microsomes from PB-, DEX- and VEH-treated rats at a PCB 136 concentration of 5 $\mu$ M.             | 11 |
| <b>FIGURE S7:</b> Time-dependent formation of 5-OH-PCB 136 atropisomers by liver microsomes from PB-, DEX- and VEH-treated rats at a PCB 136 concentration of 5 $\mu$ M.         | 12 |
| <b>FIGURE S8:</b> Time-dependent formation of 4-OH-PCB 136 atropisomers by liver microsomes from PB-, DEX- and VEH-treated rats at a PCB 136 concentration of 5 $\mu$ M.         | 13 |
| <b>References</b>                                                                                                                                                                | 14 |

**Abbreviations:** 4,5-diMeO-PCB 136, 4,5-dimethoxy-2,2',3,3',6,6'-hexachlorobiphenyl (methylated derivative of 4,5-diOH-PCB 136); 4-MeO-PCB 136, 2,2',3,3',6,6'-hexachloro-4-methoxybiphenyl (methylated derivative of 4-OH-PCB 136); 5-MeO-PCB 136, 2,2',3,3',6,6'-hexachloro-5-methoxybiphenyl (methylated derivative of 5-OH-PCB 136); 4,5-diOH-PCB 136, 2,2',3,3',6,6'-hexachlorobiphenyl-4,5-diol; 4-OH-PCB 136, 2,2',3,3',6,6'-hexachlorobiphenyl-4-ol; 5-OH-PCB 136, 2,2',3,3',6,6'-hexachlorobiphenyl-5-ol; BROD, 7-benzyloxyresorufin-O-debenzylase; BQ, 7-benzyloxyquinoline debenzilation; DEX, dexamethasone; EROD, 7-ethoxyresorufin-O-deethylase; ID, inner diameter; LOD, limit of detection; PB, phenobarbital; PCBs, polychlorinated biphenyls; PCB 136, 2,2',3,3',6,6'-hexachlorobiphenyl; VEH, vehicle (corn oil).

**TABLE S1.** Effect of treatment on body and liver weights of the male rats used for the preparation of liver microsomes.

| Treatment                 | Final weight     | Body weight change | Liver weight | Liver/body weight ratio |
|---------------------------|------------------|--------------------|--------------|-------------------------|
| Corn oil (VEH) (n=6)      | 232 ± 9          | -0.98 ± 0.89       | 8.6 ± 0.9    | 3.7 ± 0.4               |
| Phenobarbital (PB) (n=6)  | 232 ± 4          | -0.53 ± 1.8        | 10.2 ± 0.5   | 4.4 ± 0.2 <sup>\$</sup> |
| Dexamethasone (DEX) (n=4) | 175 ± 16 ***,### | -28 ± 13 ***,###   | 11.8 ± 2.2 * | 6.7 ± 0.7 ***,###       |

<sup>\$</sup> Significantly different from VEH, one-sample, one-sided test, 95% confidence level,  $p < 0.05$ , \*\*\* Significantly different from VEH, one-sample, one-sided test, 95% confidence level,  $p < 0.01$ ; ### Significantly different from PB, one-sample, one-sided test, 95% confidence level,  $p < 0.01$ . R open-source statistical software (version 2.0.0, <http://www.r-project.org/index.html>) was used for all statistical analyses.

**TABLE S2.** Activities of P450 enzymes in male rat liver microsomes. Data are the average of duplicate measurements.

| Activity assay                                  | Microsomal preparation | Reaction rate (pmol/min/mg protein)<br>(fold induction over VEH) |
|-------------------------------------------------|------------------------|------------------------------------------------------------------|
| 7-Ethoxyresorufin- <i>O</i> -deethylase (EROD)* | Corn oil               | 340                                                              |
|                                                 | Phenobarbital          | 1300 (4)                                                         |
|                                                 | Dexamethasone          | 350 (1)                                                          |
| Benzyloxyresorufin- <i>O</i> -debenzylase *     | Corn oil               | 140                                                              |
|                                                 | Phenobarbital          | 13100 (100)                                                      |
|                                                 | Dexamethasone          | 930 (7)                                                          |
| 7-Benzyloxyquinoline debenzilation (BQ)*        | Corn oil               | 6500                                                             |
|                                                 | Phenobarbital          | 15800 (2)                                                        |
|                                                 | Dexamethasone          | 54600 (8)                                                        |

\* Hepatic microsomal EROD, BROD and BQ activities were measured using established methods.<sup>1,2</sup> EROD was used to detect the activity of P450 1A with ethoxyresorufin as a substrate; BROD was used to detect the activity of P450 2B with benzyloxyresorufin as a substrate; BQ was used to detect the activity of P450 3A with benzyloxyquinoline as substrate.

**TABLE S3:** Limits of detection <sup>3</sup>, resolution and background levels of PCB 136 and hydroxylated its metabolites in control samples in the microsomal incubations.

|                                                | <b>PCB 136<br/>[ng]</b> |                | <b>5-OH-PCB 136<br/>[ng]</b> |                        | <b>4-OH-PCB 136<br/>[ng]</b> |                        | <b>4,5-diOH-PCB<br/>136 [ng]</b> |
|------------------------------------------------|-------------------------|----------------|------------------------------|------------------------|------------------------------|------------------------|----------------------------------|
|                                                | <b>(-)</b>              | <b>(+)</b>     | <b>E<sub>(1)</sub></b>       | <b>E<sub>(2)</sub></b> | <b>E<sub>(1)</sub></b>       | <b>E<sub>(2)</sub></b> |                                  |
| <i>LOD</i> on Chirasil-Dex column <sup>*</sup> | 22.9<br>(n = 5)         | 0.9<br>(n = 5) | 9.9<br>(n = 16)              | 16.8<br>(n = 16)       |                              |                        |                                  |
| <i>LOD</i> on Cyclosil-B column <sup>*</sup>   |                         |                |                              |                        | 4.3<br>(n=19)                | 4.7<br>(n=19)          |                                  |
| Resolution <sup>&amp;</sup>                    | 0.910                   |                | 0.714                        |                        | 0.741                        |                        |                                  |
| <i>LOD</i> on DB1-MS column <sup>*</sup>       | 55.3<br>(n = 11)        |                | 6.0<br>(n = 11)              |                        | 12.9<br>(n = 11)             |                        | 1.6<br>(n = 11)                  |
| Background                                     | 21.0 ± 36.2<br>(n = 6)  |                | 2.9 ± 1.5<br>(n = 14)        |                        | 4.2 ± 1.2<br>(n = 14)        |                        | 0.5 ± 0.3<br>(n = 14)            |

<sup>\*</sup> The *LOD* was calculated from blank samples as  $LOD = \overline{x}_b + k \cdot s_b$ , where  $\overline{x}_b$  is mean of samples,  $k$  is Student's t-value for n-1 degrees of freedom at 99% confidence level, and  $s_b$  is standard deviation of the blank measures; <sup>&</sup> The resolution ( $R_s$ ) was calculated using the formula  $R_s = (t_{R2} - t_{R1})/0.5(BW_1 + BW_2)$ , where  $t_{R2}$  and  $t_{R1}$  are the retention times of the first and second eluting enantiomer, and  $BW_1$  and  $BW_2$  are the baseline width of the first and second eluting enantiomer.<sup>4</sup>

**TABLE S4:** Ratios of 5-OH-PCB 136 and 4-OH-PCB 136 formed in different microsomal incubations over time (50  $\mu$ M PCB 136).

| Incubation (min) | 5-OH-PCB 136 |         |        | 4-OH-PCB 136 |         |        |
|------------------|--------------|---------|--------|--------------|---------|--------|
|                  | PB:VEH       | DEX:VEH | PB:DEX | PB:VEH       | DEX:VEH | PB:DEX |
| 1                | 48           | 5.7     | 8.5    | 1.2          | 0.6     | 1.9    |
| 2                | 84           | 7.8     | 10.7   | 2.5          | 0.9     | 3.0    |
| 3                | 58           | 6.3     | 9.3    | 1.4          | 0.7     | 2.0    |
| 5                | 56           | 5.7     | 9.9    | 1.8          | 0.6     | 3.0    |
| 10               | 49           | 5.1     | 9.6    | 1.6          | 0.6     | 2.6    |
| 20               | 43           | 4.5     | 9.4    | 1.6          | 0.6     | 2.6    |
| 30               | 37           | 3.7     | 10.1   | 1.6          | 0.6     | 2.8    |

**TABLE S5:** Ratios of 5-OH-PCB 136 and 4-OH-PCB 136 formed in different microsomal incubations over time (5  $\mu$ M PCB 136).

| Incubation (min) | 5-OH-PCB 136 |         |        | 4-OH-PCB 136 |         |        |
|------------------|--------------|---------|--------|--------------|---------|--------|
|                  | PB:VEH       | DEX:VEH | PB:DEX | PB:VEH       | DEX:VEH | PB:DEX |
| 1                | 46           | 7.1     | 6.6    | 1.2          | 0.8     | 1.5    |
| 2                | 44           | 7.1     | 6.2    | 1.2          | 0.9     | 1.3    |
| 3                | 34           | 6.3     | 5.4    | 0.7          | 0.8     | 0.9    |
| 5                | 21           | 6.7     | 3.1    | 0.4          | 1.2     | 0.3    |
| 10               | 0            | 5.9     | 0      | 0.0          | 1.1     | 0.0    |
| 20               | 0            | 6.5     | 0      | 0.0          | 0.8     | 0.1    |
| 30               | 0            | 6.8     | 0      | 0.0          | 0.7     | 0.1    |

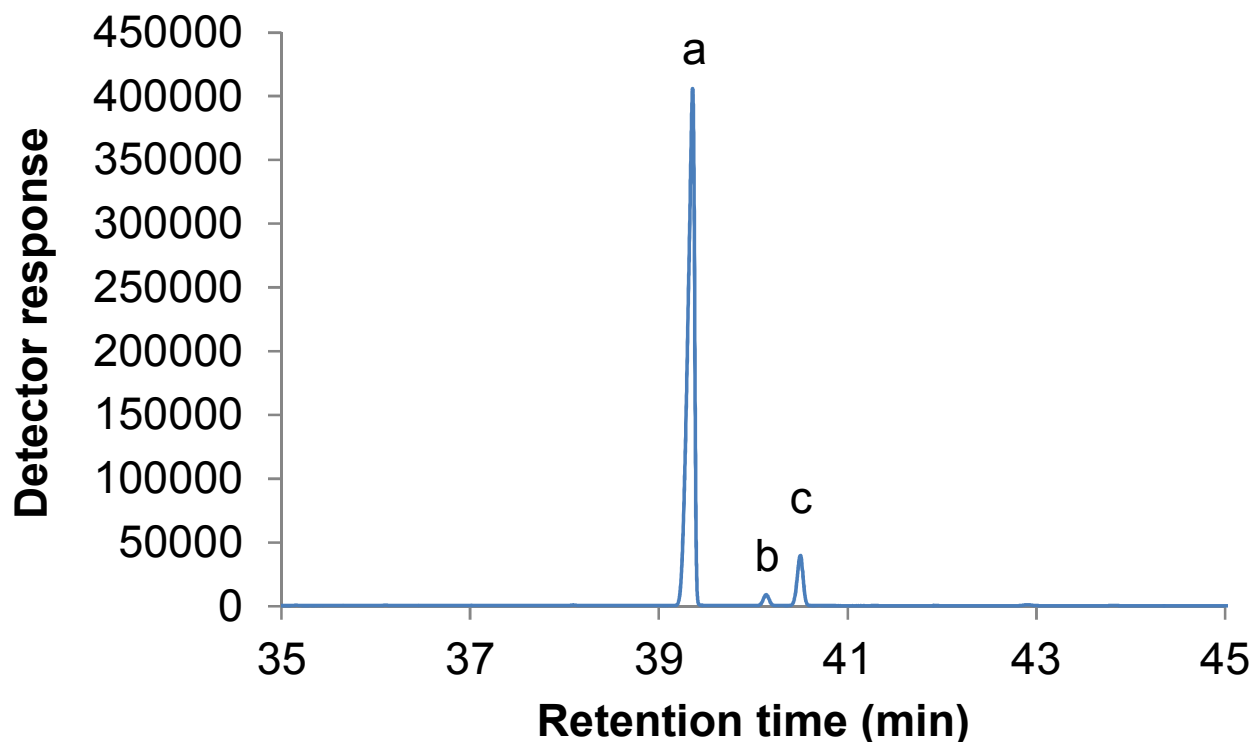

**FIGURE S1:PCB 136 is metabolized to three hydroxylated metabolites by liver microsomes prepared from PB-treated rats.** PCB 136 (50  $\mu$ M) was incubated with rat liver microsomes for 30 min, the incubation mixture was extracted as described under Materials and Methods, derivatized with diazomethane and analyzed by GC/MS in the selected ion monitoring mode using  $m/z = 389.9$  and  $419.8$ . The analysis of hydroxylated metabolites was carried out using an Agilent 6890N gas chromatograph with 5975 mass selective detector and a DB1-MS capillary column (60 m x 0.25 mm ID x 0.25  $\mu$ m film thickness; Agilent, Santa Clara, CA, USA). The temperature program was as follows: 100  $^{\circ}$ C for 1 min, 5  $^{\circ}$ C/min to 250  $^{\circ}$ C, hold for 20 min, 5  $^{\circ}$ C/min to 280  $^{\circ}$ C, hold for 3 min. Based on the mass spectra and the retention times of the authentic compounds (a) is 5-OH-PCB 136, (b) is 4-OH-PCB 136 and (c) is 4,5-diOH-PCB 136. The same three metabolites were observed in the total ion chromatogram and their mass spectra are shown in Fig S2.

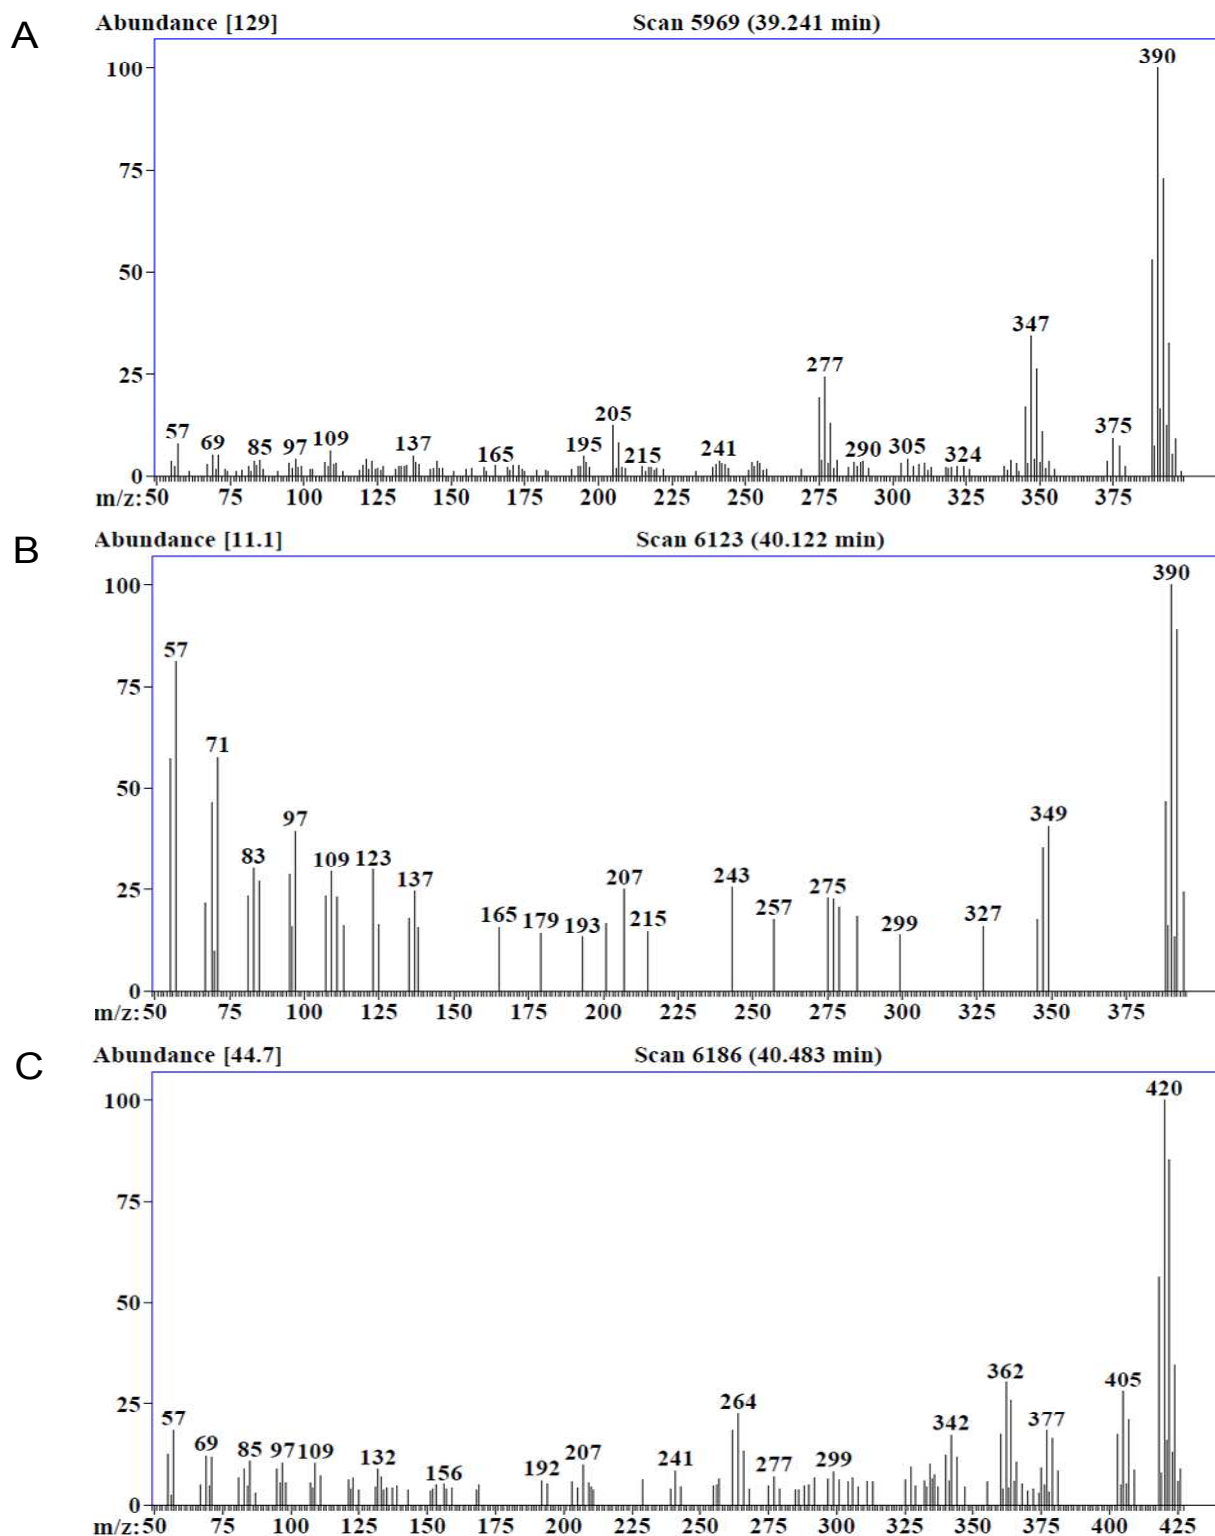

**FIGURE S2:** Mass spectra of the methylated derivatives of 5-OH-PCB 136 (A), 4-OH-PCB 136 (B) and 4,5-diOH-PCB 136 (C). The anticipated molecular weights (first isotopic peak only) are 390.9, 390.9 and 421.94 for 5-MeO-PCB 136, 4-MeO-PCB 136, and 4,5-diMeO-PCB 136, respectively. The only difference in the mass spectra of 5-MeO-PCB 136 and 4-MeO-PCB 136 is that 5-MeO-PCB 136 gave a peak at  $m/z$  375 [M-15]. The mass spectra are in good agreement with the published mass spectra of methylated PCB 136 metabolites.<sup>5,6</sup> The retention times are 39.2, 40.1 and 40.5 min for the methylated derivatives of 5-OH-PCB 136, 4-OH-PCB 136 and 4,5-diOH-PCB 136, respectively.

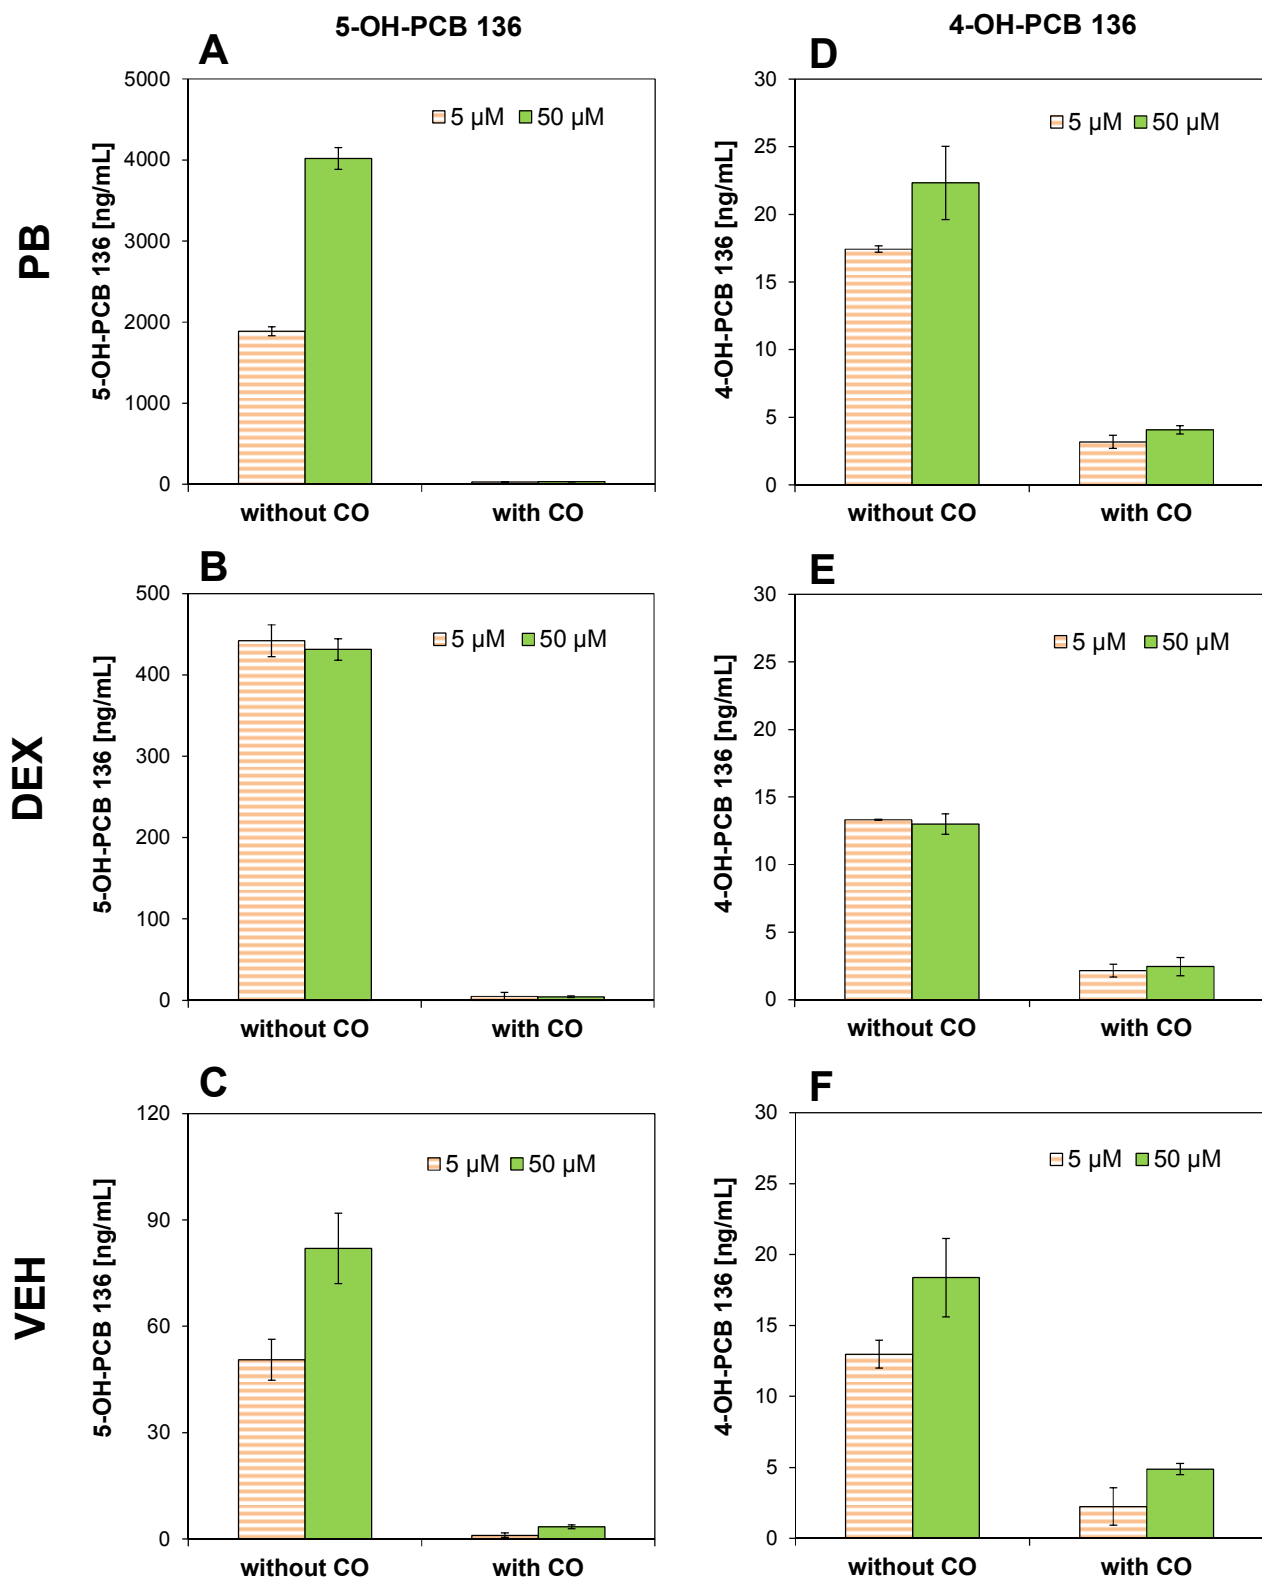

**FIGURE S3:** Pre-treatment of rat liver microsomes with carbon monoxide (CO) inhibited the metabolism of PCB 136 (5  $\mu$ M and 50  $\mu$ M) and reduced the formation of 5-OH and 4-OH PCB 136. The microsomes were obtained from the rats treated with PB (A and D), DEX (B and E), or VEH (C and F). All microsomal incubations were performed at 37 °C for 5 min. The data represented as mean  $\pm$  SD (n=3). The level of 4-OH-PCB 136 was below the detection limit in incubations with CO (**Table S3**)

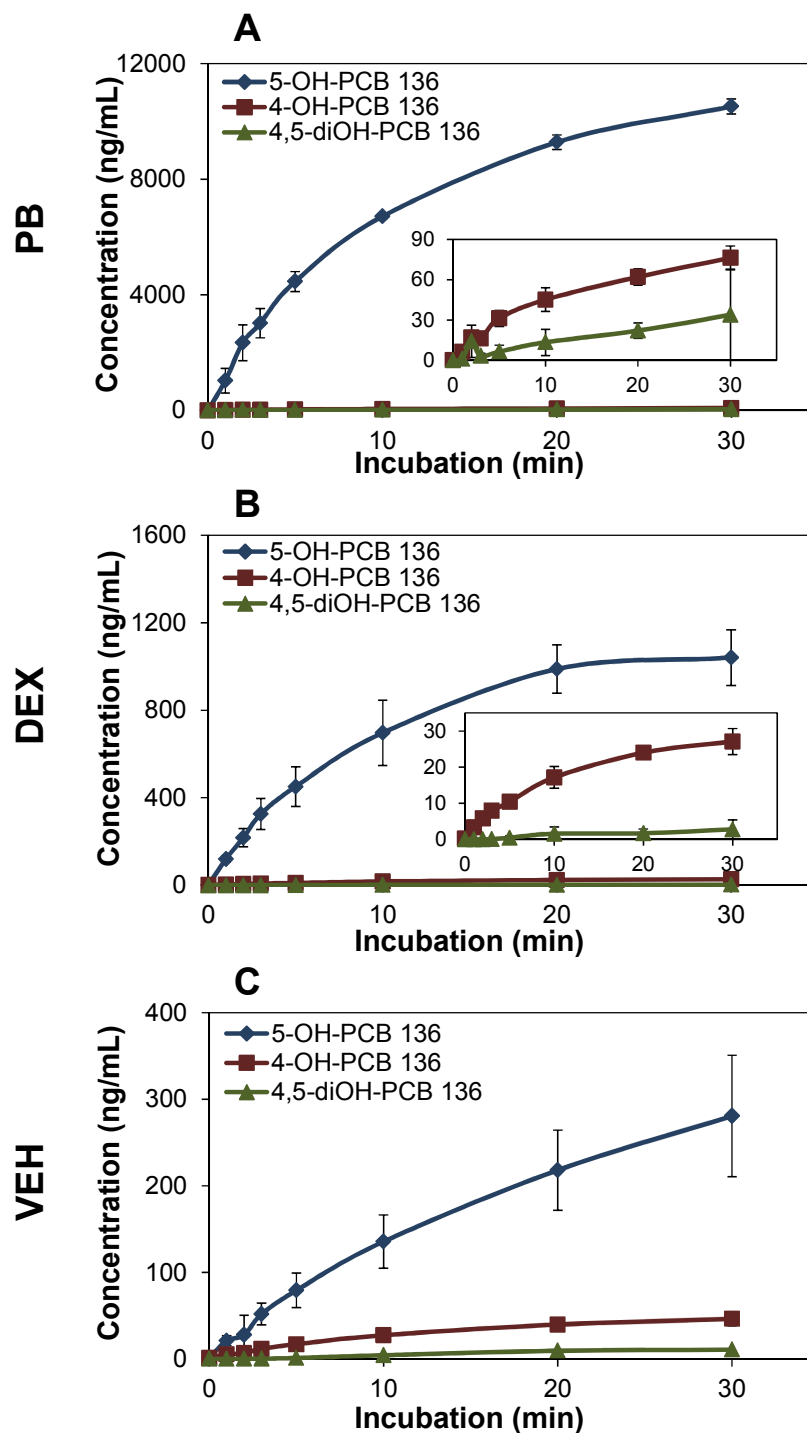

**FIGURE S4:** Time-dependent formation of hydroxylated PCB 136 metabolites by liver microsomes from (A) PB-, (B) DEX- and (C) VEH-treated rats at a PCB 136 concentration of 50  $\mu$ M. PCB 136 was incubated for 30 min at 37  $^{\circ}$ C and 2 mL aliquots of the incubation mixture were removed at defined time points. The hydroxylated PCB metabolites were extracted as described under Materials and Methods. The gas chromatographic analysis was carried out using an Agilent 6890N gas chromatograph with  $^{63}$ Ni-  $\mu$ ECD detector and DB1-MS capillary column (60 m x 0.25 mm ID x 0.25  $\mu$ m film thickness; Agilent, Santa Clara, CA, USA). The temperature program was as follows: 100  $^{\circ}$ C for 1 min, 5  $^{\circ}$ C/min to 250  $^{\circ}$ C, hold for 20 min, 5  $^{\circ}$ C/min to 280  $^{\circ}$ C, hold for 3 min. Inserted figures in (A) and (B) showed the concentrations of 4-OH-PCB 136 and 4,5-diOH-PCB 136 by liver microsomes from PB and DEX-treated rats, respectively.

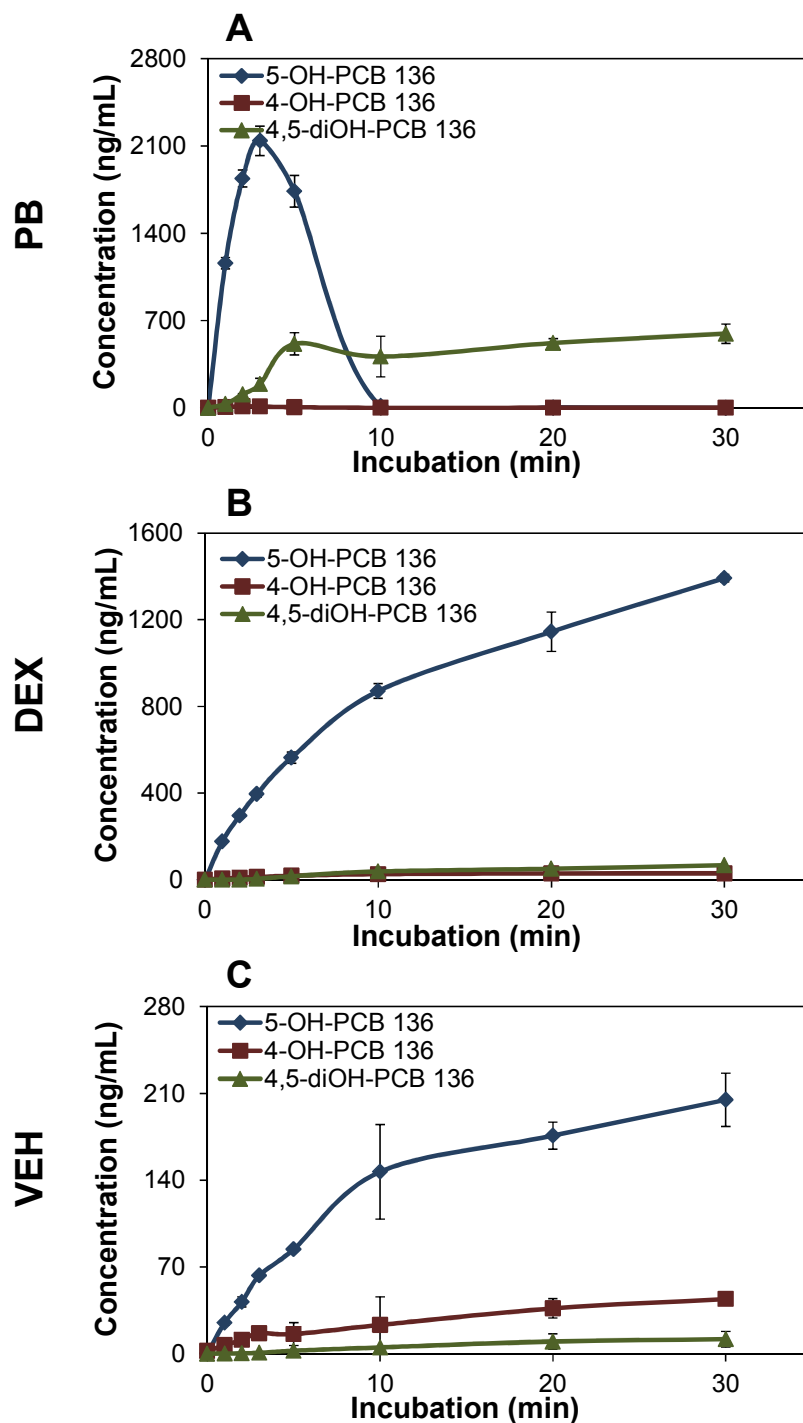

**FIGURE S5:** Time-dependent formation of hydroxylated PCB 136 metabolites by liver microsomes from (A) PB-, (B) DEX- and (C) VEH-treated rats at a PCB 136 concentration of 5  $\mu$ M. PCB 136 was incubated for 30 min at 37  $^{\circ}$ C and 2 mL aliquots of the incubation mixture were removed at defined time points. The hydroxylated PCB metabolites were extracted as described under Materials and Methods. The gas chromatographic analysis was carried out using an Agilent 6890N gas chromatograph with  $^{63}$ Ni-  $\mu$ ECD detector and DB1-MS capillary column (60 m x 0.25 mm ID x 0.25  $\mu$ m film thickness; Agilent, Santa Clara, CA, USA). The temperature program was as follows: 100  $^{\circ}$ C for 1 min, 5  $^{\circ}$ C/min to 250  $^{\circ}$ C, hold for 20 min, 5  $^{\circ}$ C/min to 280  $^{\circ}$ C, hold for 3 min.

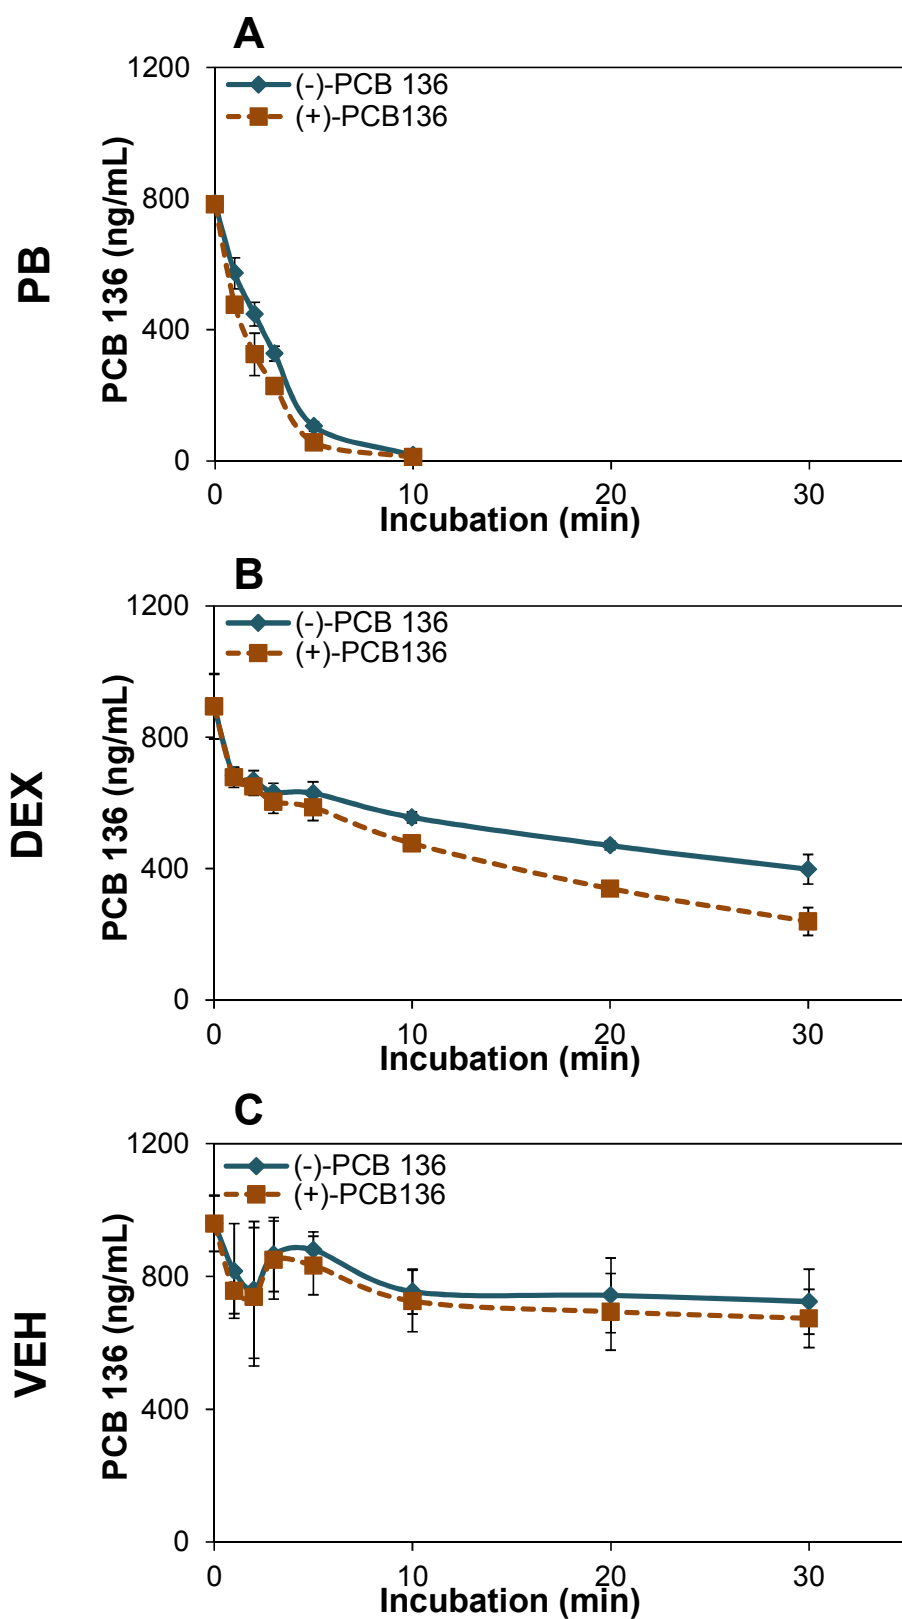

**FIGURE S6:** Time-dependent metabolism of PCB 136 atropisomers by liver microsomes from (A) PB-, (B) DEX- and (C) VEH-treated rats at a PCB 136 concentration of 5  $\mu$ M. PCB 136 was incubated for 30 min at 37  $^{\circ}$ C and 2 mL aliquots of the incubation mixture were removed at defined time points. See Figure S4 and Materials and Methods for additional details.

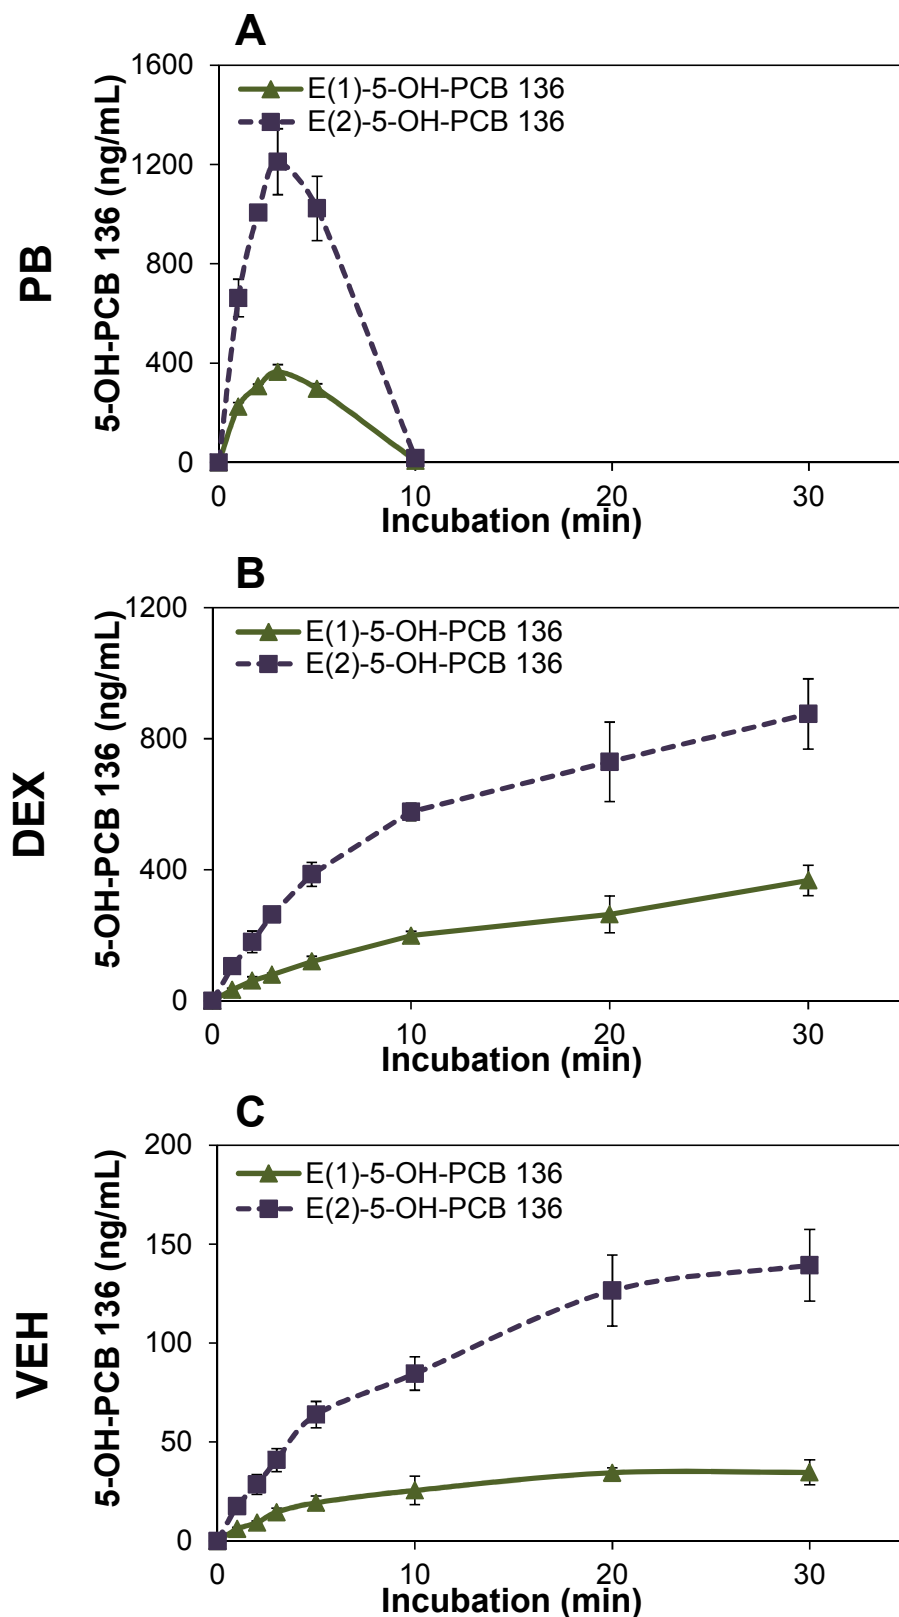

**FIGURE S7:** Time-dependent formation of 5-OH-PCB 136 atropisomers by liver microsomes from (A) PB-, (B) DEX- and (C) VEH-treated rats at a PCB 136 concentration of 5  $\mu$ M. PCB 136 was incubated for 30 min at 37  $^{\circ}$ C and 2 mL aliquots of the incubation mixture were removed at defined time points. See Figure S4 and Materials and Methods for additional details.

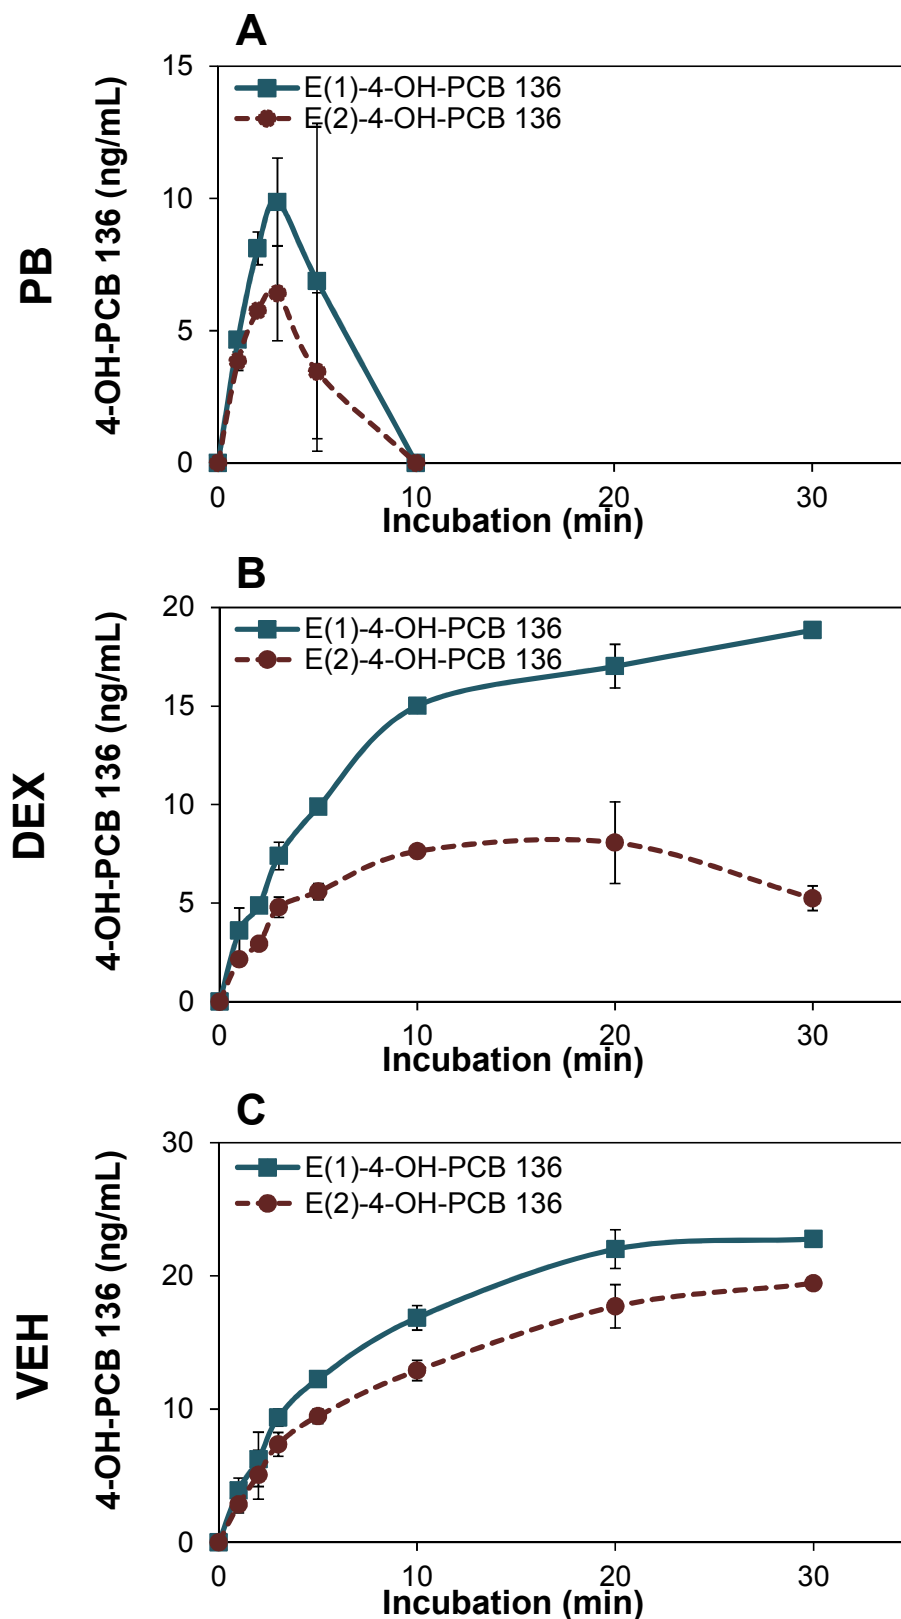

**FIGURE S8:** Time-dependent formation of 4-OH-PCB 136 atropisomers by liver microsomes from (A) PB-, (B) DEX- and (C) VEH-treated rats at a PCB 136 concentration of 5  $\mu$ M. PCB 136 was incubated for 30 min at 37  $^{\circ}$ C and 2 mL aliquots of the incubation mixture were removed at defined time points. See Figure S4 and Materials and Methods for additional details.

## References

- (1) Lagueux, J., Affar, E. B., Adeau, D., Ayotte, P., Dewailly, D., and Poirer, G. G. (1997) A microassay for the detection of low levels of cytochrome P450 O-deethylation activities with alkoxyresorufin substrates. *Mol. Cell. Biochem.* 175, 125-129.
- (2) Renwick, A. B., Lavignette, G., Worboys, P. D., Williams, B., Surry, D., Lewis, D. F. V., Price, R. J., Lake, B. G., and Evans, D. C. (2001) Evaluation of 7-benzyloxy-4-trifluoromethyl-coumarin, some other 7-hydroxy-4-trifluoro-methylcoumarin derivatives and 7-benzyloxyquinoline as fluorescent substrates for rat hepatic cytochrome P450 enzymes. *Xenobiotica.* 31, 861-878.
- (3) Tabb, M. M., Kholodovych, V., Grun, F., Zhou, C., Welsh, W. J., and Blumerg, B. (2003) Highly chlorinated PCBs inhibit the human xenobiotic response mediated by the steroid and xenobiotic receptor (SXR). *Environ. Health Persp.* 112, 163-169.
- (4) Kania-Korwel, I., Vyas, S., Song, Y., and Lehmler, H. J. (2008) Gas chromatographic separation of methoxylated polychlorinated biphenyl atropisomer. *J. Chromatogr. A* 1207, 146-154.
- (5) Waller, S. C., He, Y. A., Harlow, G. R., He, Y. Q., Mash, E. A., and Halpert, J. R. (1999) 2,2',3,3',6,6'-hexachlorobiphenyl hydroxylation by active site mutants of cytochrome P450 2B1 and 2B11. *Chem. Res. Toxicol.* 12, 690 -699.
- (6) Schnellmann, R., Putnam, C., and Sipes, I. (1983) Metabolism of 2,2',3,3',6,6'-hexachlorobiphenyl and 2,2',4,4',5,5'-hexachlorobiphenyl by human hepatic microsomes. *Biochem. Pharmacol.* 32, 3233-3239.
